# Supplementary material for: Tolvaptan-induced hypernatremia related to low serum potassium level accompanying high blood pressure in patients with acute decompensated heart failure
Source: Research Square preprint supplement (doi:10.21203/rs.3.rs-39563/v4), 2020-10-28
Supplement: Supplementary file 1 [file 53c976ca09abfcf2b2ba6297.xlsx]

## Sheet: Sheet1
No.	ID	入院日	年齢	性別 男:1 女:0	身長	入院時体重	BMI	既往歴 -:0 +:1							入院時降圧薬			入院時利尿薬 ×:0 〇:1			入院時脂質改善薬	入院時尿酸値改善薬	NYHA	CS	Nohria		基礎心疾患 ×:0 ○:1				LVEF	通常時eGFR	サムスカ最大投与量	サムスカ投与日数	サムスカ副作用 ×:0 ○:1				ハンプ容量	ハンプ投与日数	退院時サムスカ継続 ×:0 ○:1	入院日数	備考	死亡 なし:0 あり:1	死亡日、原因	尿量
								DM	HT	DLp	AF	IHD	OCI	心不全既往	ACE0I,ARB	βblocker	CCB	ループ利尿薬	抗アルドステロン薬	サイアザイド系					wet or dry dry:0 wet:1	1 or 0 0:0 1:1	虚血	不整脈	弁膜症	心筋症					高Na血症	口渇	肝機能障害	ハンプ投与								BL	day1	day2	day3
1	5374551	20160329	85	0	137	37	19.7134	0	1	1	0	0	0	1	0	0	0	0	0	0	1	0	4	1	1	1	0	1	0	0	35	62.1	7.5	3	0	0	0	1	0.0375375	7	0	12	post PMI	0		1060	1400	2800	2050
2	3716018	20160409	87	1	167	61	21.8724	0	1	0	0	0	1	0	1	1	0	1	0	0	1	1	3	2	1	1	0	0	0	0	19	73.2	7.5	3	0	0	0	1	0.0227687	5	0	14	心機能低下の原因は不詳	0		2700	4900	2760	1500
3	1225267	20160425	81	1	162	64	24.3865	1	0	1	0	0	0	1	1	1	0	1	0	0	1	1	2	2	1	1	1	0	0	0	19	30.7	7.5	3	0	0	0	1	0.0217014	3	0	16	post PMI	0		1800	3200	1850	1200
4	2854325	20160616	89	1	146	54	25.3331	0	1	0	0	1	0	0	0	0	0	0	0	0	0	0	3	1	1	1	1	0	0	0	37	53.8	7.5	2	1	1	0	1	0.0257202	5	0	8	内服自己中断心不全	0		1115	3590	2690
5	5409328	20160630	80	1	149	48	21.6206	0	1	0	1	0	0	0	0	0	0	0	0	0	0	0	3	1	1	1	0	1	0	0	57	45.6	7.5	3	0	0	0	1	0.0289352	4	0	27	HCM疑い	0		1400	2300	1700	1200
6	5417676	20160721	76	1	168	63.5	22.4986	1	1	0	0	0	1	0	0	0	1	1	0	0	0	0	4	1	1	1	0	1	1	1	32	45.4	7.5	3	0	0	0	1	0.0218723	5	0	28	moderateAS	0		1490	2620	2640	2820
7	1225267	20161215	81	1	162	64.5	24.577	1	0	1	0	0	0	1	1	1	0	1	0	0	1	1	2	2	1	1	1	0	0	0	26	26.8	7.5	14	0	0	0	1	0.0215332	6	1	14		0		400	4500	2100	2500
8	18411	20161101	78	0	145	37.5	17.8359	1	1	1	0	0	0	1	0	0	1	1	0	0	0	0	3	2	1	1	0	0	0	1	28	61.1	15	28	0	0	0	1	0.037037	7	0	30		0		1850	2400	2200	1000
9	18411	20161215	79	0	145	41	19.5006	1	1	1	0	0	0	1	1	1	0	0	0	0	0	0	3	2	1	1	0	0	0	1	43	34.6	15	16	0	0	0	1	0.0338753	7	0	18	mrsa敗血症、死亡退院	0		1300	1650	900	1300
10	604055	20161109	48	1	171	98.4	33.6514	0	1	0	1	0	0	0	0	0	1	1	0	0	0	0	2	2	1	1	0	1	0	1	13	60.5	7.5	7	0	0	0	1	0.0141147	5	0	21	DCMlike	1	20170101、MRSA敗血症	9400	6600	6800	4100
11	623383	20161125	79	1	152	65.4	28.3068	1	0	0	0	1	0	0	0	0	0	1	0	0	0	0	3	2	1	1	1	0	0	0	39	27.1	7.5	7	0	0	0	1	0.0212368	4	0	30	OMI,IHD	0		2000	600	1850	1450
12	942804	20161227	74	0	153	54	23.0681	0	0	0	1	0	1	1	0	1	0	1	0	0	0	1	2	2	1	1	0	1	1	0	60	49.8	7.5	1	1	0	0	1	0.0257202	7	0	16	severeMR,TR	0		4200	3300	1400	2200
13	3563405	20170105	76	0	160.5	65	25.2327	0	1	1	1	0	0	0	0	0	0	0	0	0	0	0	2	1	1	1	0	1	0	0	76	48.8	7.5	7	1	0	0	1	0.0213675	7	0	21	Af tachy	0		1900	2950	1600	1900
14	2000195	20170110	67	0	152	50.9	22.0308	1	1	0	0	0	0	0	1	0	1	1	0	0	0	0	2	1	1	1	0	0	0	0	80	113.8	7.5	14	0	0	0	1	0.0272866	4	1	14	post ASD closure, PAPVC rest	0		2300	1700	2100	2250
15	5485646	20170118	69	1	175.5	82.7	26.8504	0	1	1	1	0	0	0	1	1	1	1	0	0	0	0	2	2	1	1	0	1	0	0	74	45.5	7.5	8	0	0	0	1	0.0167943	9	0	11		0		1600	2400	5500	2800
16	5491372	20170203	88	1	155.5	42.2	17.4523	0	1	0	1	0	0	0	0	0	1	1	0	0	0	0	3	1	1	1	0	1	0	0	88	65.8	7.5	3	1	0	0	1	0.0329121	2	0	36	CAVB、pAf、入院中にPMI	0		1600	600	500	500
17	675932	20170206	68	1	166.7	64.3	23.1387	0	0	0	1	0	0	0	0	1	0	0	0	0	0	0	3	2	1	1	0	1	1	0	18	71.8	7.5	8	0	0	0	1	0.0216001	5	0	13	Af tachy、頻脈性心筋症	0		770	3770	2780	1975
18	832415	20170208	67	1	162.5	57.7	21.8509	0	0	0	0	1	0	1	0	1	0	0	0	0	1	0	2	2	1	1	1	0	1	0	36	50.3	7.5	11	0	0	0	1	0.0240709	6	1	11	OMI.IHD	0		1200	1500	1100	1400
19	2300227	20170216	84	1	166.3	74	26.7576	0	1	1	1	0	0	1	0	1	1	0	0	0	1	1	2	1	1	1	0	1	0	0	71	36.2	7.5	7	0	0	0	1	0.0187688	7	0	15	Af、ややbrady気味	0		900	1900	1500	3000
20	3559321	20170224	92	1	164.5	55.7	20.5837	0	0	0	0	1	0	1	0	0	0	1	0	1	0	1	3	2	1	1	1	0	0	0	14	28.1	15	ー	0	0	0	1	0.0249352	4	0	17	入院前よりサムスカ15mgあり	1	20170926、心不全増悪・VT
21	942804	20170228	75	0	153	57	24.3496	0	0	0	1	0	1	1	0	1	0	1	0	0	0	1	2	2	1	1	0	1	1	0	55	44.1	7.5	2	0	0	0	1	0.0243665	3	0	10	severeMR,TR	0		2300	4700	3800	1200
22	5500852	20170228	59	1	177	67	21.3859	0	0	0	1	0	0	0	0	0	0	0	0	0	0	0	3	2	1	1	0	1	0	0	16	65.9	7.5	7	0	0	0	1	0.0207297	3	0	18	ASD術後	0		1100	4400	3900	3600
23	3844442	20170303	51	1	170	137	47.4048	1	1	0	0	0	0	1	0	0	0	0	0	0	0	0	4	1	1	1	0	0	0	1	18	47.5	7.5	2	1	0	0	1	0.0101379	8	0	22	数年前から薬自己中断	0		5200	4200	10500	6900
24	5329502	20170306	85	1	157.3	63.1	25.5019	0	1	1	0	0	0	0	1	1	1	0	0	0	1	1	2	2	1	1	0	1	0	0	73	15.6	7.5	2	1	0	0	1	0.0220109	8	0	12	SSS(薬剤性ﾍﾙﾍﾞｯｻｰ)&CRF	1	20171001、感染症で死亡	600	2840	4560	1500
25	5255966	20170307	82	1	171	79.7	27.2562	0	1	1	0	0	0	1	1	0	1	0	0	0	1	0	3	1	1	1	0	0	0	0	67.1	67.2	7.5	7	0	0	0	1	0.0174265	7	0	11	心不全？	0		2300	3800	500	1100
26	5374551	20170307	86	0	137	37	19.7134	0	1	1	0	0	0	1	1	0	1	1	0	0	1	0	4	1	1	1	1	1	0	0	39	62.1	7.5	1	0	0	0	1	0.0375375	2	0	17	postPMI+IHD	0		2200	3400	1600	1500
27	758004	20170309	92	0	148	65	29.6749	0	1	0	0	0	0	0	1	0	0	0	0	0	0	0	4	2	1	1	0	0	0	1	69.4	53	7.5	5	0	0	0	1	0.0213675	5	0	16	apicalHCM	0		1800	900	1400	950
28	691184	20170314	81	0	147.1	42.85	19.8027	1	1	1	1	0	0	1	1	0	0	0	0	0	1	0	2	1	1	1	0	1	1	0	32.7	75.1	7.5	1	0	0	0	1	0.0324128	3	1	29		0		1900	2650	1550	1100
29	5389518	20170317	81	1	156.3	67.5	27.6303	1	1	1	1	0	0	1	0	1	0	0	0	0	1	0	2	2	1	1	0	1	0	0	32	67.5	7.5	1	1	0	0	1	0.0205761	8	0	27	Af	0		5500	3600	1900	4000
30	21871	20170320	85	1	160	52.8	20.625	0	1	0	0	1	0	0	0	0	1	1	1	1	0	0	2	2	1	1	0	0	0	0	66.5	53.4	7.5	11	0	0	0	1	0.0263047	8	0	32		0		1600	3500	4700	2200
31	1155323	20170310	80	1	158.2	64.7	25.8518	1	1	1	1	1	0	1	1	0	1	1	0	0	1	1	2	2	1	1	1	1	1	0	40	45.8	7.5	7	0	0	0	1	0.0214666	4	0	17		0		400	900	1700	900
32	2990044	20170315	82	0	157	54.5	22.1104	1	1	1	0	1	0	1	0	0	1	1	0	0	0	1	3	2	1	1	1	0	0	0	32	14.9	7.5	11	0	0	0	1	0.0254842	7	0	23	おそらくOMI	0		1205	2060	2400	3400
33	231243	20170327	60	1	165	79.6	29.2378	0	0	0	1	1	0	1	0	0	0	0	0	0	0	0	2	2	1	1	1	1	0	0	31	49.1	7.5	17	0	0	0	1	0.0174484	8	0	36		0		2220	6300	6300	4200
34	3800587	20170328	77	1	153.8	56.1	23.7165	1	0	0	1	0	0	0	0	0	0	1	0	1	0	0	2	2	1	1	0	1	0	0	41	34.8	7.5	2	0	0	0	1	0.0247574	3	0	28	利尿十分でサムスカ終了	0		900	2324	4200	1900
35	5511207	20170328	87	0	140	53.9	27.5	0	1	1	1	0	0	0	1	1	0	1	0	0	0	0	1	3	1	1	0	1	0	0	31	51.5	7.5	10	0	0	0	1	0.0257679	7	0	22	Af、後日肺炎入院で死亡	1	20170236、肺炎・敗血症	1100	700	1300	1900
36	1453616	20170330	81	1	160	62.3	24.3359	1	1	0	0	1	1	1	0	0	0	0	0	0	0	0	3	2	1	1	1	0	0	0	20	43	7.5	7	0	0	0	1	0.0222936	7	0	27	OMI、内服中断	0		100	700	2600	2100
37	1222279	20170331	69	0	157	57.1	23.1652	1	0	0	1	0	0	1	0	1	0	0	0	0	0	0	3	2	1	1	0	1	0	0	66.6	13.6	7.5	7	0	0	0	1	0.0243238	5	0	21	Af	0		1000	900	1500	3660
38	2756182	20170402	74	1	172.2	67.8	22.8646	1	0	0	1	1	0	1	1	1	1	0	0	0	0	0	3	1	1	1	1	1	0	0	49	37.7	7.5	2	1	0	0	1	0.0204851	6	0	22	Af,OMI	0		500	2600	2300	1700
39	220442	20170404	83	1	163	72.1	27.1369	0	1	0	0	0	0	1	1	1	1	0	0	0	0	0	3	1	1	1	0	0	0	0	66	22.7	7.5	25	0	0	0	1	0.0192634	7	1	25	SSS,CRF,退院後CPA	0		2600	3480	2000	2000
40	1788364	20170405	77	0	143.3	33.9	16.5085	0	0	1	1	0	1	1	0	1	0	1	1	0	1	0	2	2	1	1	0	0	1	0	60.8	57.3	7.5	18	0	0	0	1	0.0409702	7	1	18	連合弁膜症術後、AfMaze、溶結性貧血、内服自己中断	0		2000	1400	1600	1700
41	2267264	20170418	83	1	150	60.8	27.0222	0	1	0	1	0	0	1	1	1	1	1	1	0	0	0	3	2	1	1	0	1	0	0	60.8	40.4	15	19	0	0	0	1	0.0228436	10	1	19	Af	0		1170	2630	1900
42	2726795	20170418	52	1	163	66.3	24.9539	1	0	0	0	1	0	0	0	0	0	1	0	0	0	0	3	2	1	1	1	0	0	0	14	61.7	7.5	7	0	0	0	1	0.0209486	7	0	16	OMI,IHD	1	20170913、LMT-AMI-PCPS	1800	1500	4200	4800
43	3063598	20170421	86	0	148.2	47.9	21.8092	0	0	0	1	0	0	0	0	0	0	0	0	0	0	0	2	1	1	1	0	1	1	0	34	64.6	3.75	6	0	0	0	1	0.0289956	8	0	27	AR,Af	0		1500	1900	2100	2200
44	1222279	20170506	69	0	157	51.4	20.8528	1	0	0	1	0	0	1	0	1	0	0	0	0	0	0	3	3	1	1	0	1	1	0	65.8	10.7	7.5	4	0	0	0	1	0.0270212	2	0	15	Af	0		1020	1650	1063	3180
45	1119408	20170509	93	0	148.5	55	24.9408	0	0	0	1	0	0	1	0	1	0	0	0	0	0	0	2	2	1	1	0	1	1	0	71.5	42.4	7.5	2	0	0	0	1	0.0252525	8	0	17	TR	0		1900	2600	3550	1800
46	2613416	20170512	79	0	152.4	48	20.6667	0	1	0	1	0	0	1	1	1	1	1	0	0	0	0	4	2	1	1	0	1	1	0	65	66.7	15	14	0	0	0	1	0.0289352	2	1	14	元より右心不全、サムスカ7.5mg内服あり	0		420	1260	4120	3400
47	1225267	20170519	82	1	162	63	24.0055	1	0	1	0	0	0	1	1	1	0	1	0	0	1	1	2	2	1	1	1	0	0	0	21	26.5	15	22	0	0	0	1	0.0220459	4	1	22	元よりサムスカ7.5mg、入院中のみ15mg	0		2750	1700	1500	1300
48	5354145	20170613	76	1	164	61.5	22.8659	1	1	1	0	1	0	1	1	1	0	0	0	0	1	1	3	1	1	1	1	0	1	0	34.2	47.1	15	9	0	0	0	1	0.0225836	3	0	19	TLV7.5mgで開始、day3より15、弁膜症術後	0		1100	2300	2500	2100
49	5545591	20170628	80	1	148	35.2	16.0701	0	0	0	0	0	0	0	0	0	0	0	0	0	0	0	3	1	1	1	0	0	1	0	72	57.7	7.5	12	0	0	0	1	0.0394571	3	0	35	進行胃癌合併あり、後日死亡	1	20171023、MK	460	1700	891	985
50	5546395	20170630	83	1	162	39.6	15.0892	0	1	0	1	0	0	0	1	0	1	0	0	0	0	0	3	1	1	1	0	1	0	0	50.6	84.9	7.5	2	1	0	1	1	0.035073	1	0	145	肺炎、sepsisにより死亡退院	1	20171124、敗血症	2500	1400	705	380
51	573454	20170716	80	0	155	50	20.8117	0	1	1	1	0	0	1	0	1	1	1	1	0	0	1	2	2	1	0	0	1	0	1	45	31.4	7.5	6	0	0	0	0		0	0	59	元よりTLV7.5mg内服？入院中に中止	0		2580	2570	2300	1800
52	966529	20170802	77	0	163	56	21.0772	0	0	0	0	0	0	0	0	0	0	0	0	0	0	0	3	1	1	1	0	1	1	0	32	69	7.5	4	1	0	0	1	0.0248016	3	0	18		0		2600	4200	4800	2500
53	5486208	20170804	76	0	147	62.5	28.9231	1	1	1	1	1	0	0	0	1	1	1	1	0	1	0	2	1	1	1	0	1	0	0	66.1	55.1	7.5	2	1	0	0	1	0.0222222	4	0	13		0		2800	1800	1800	1700
54	5484530	20170807	84	1	169	70.9	24.8241	0	0	0	0	0	0	1	0	0	1	1	1	0	0	0	2	2	1	1	0	0	0	1	76.1	45	15	15	0	0	0	0		0	0	17	TLVday5より増量し尿量up、HCM-VTで死亡	1	20170823、HCM-VT	330	420	700	500
55	490276	20170812	85	1	156	52	21.3675	0	1	0	0	0	0	1	1	1	0	1	0	0	0	1	3	2	1	0	0	0	1	0	34.4	29	7.5	7	0	0	0	0		0	0	7	severeAS,突然RonTにて死亡	1	20170818、入院中にVT/VF	275	1750	3000	2750
56	5546527	20170816	69	0	149.3	55.9	25.078	1	1	0	0	0	0	0	1	0	1	1	0	0	0	0	2	2	1	1	1	0	0	0	15.8	50	7.5	14	0	0	0	0		0	1	14	入院後にサムスカ、スピロノラクトン追加	0		3150	2600	2550	2700
57	5188995	20170907	85	0	138.3	47.3	24.7296	1	1	1	0	0	0	1	1	1	0	1	0	0	0	1	3	1	1	1	0	0	1	0	35.3	38	3.75	44	0	0	0	1	0.0293634	7	1	44	元よりTLV3.75あり、入院後にhANP	0		2240	1955	1950	1630
58	5578010	20170919	50	1	172	122	41.2385	0	0	0	0	0	0	0	0	0	0	0	0	0	0	0	3	2	1	1	0	1	0	0	15.8	64.9	7.5	22	0	0	0	1	0.0113843	3	0	30	AF tachy、最終的にEF正常化	0		3600	2700	3500	3850
59	5580882	20170927	86	0	142	46.5	23.0609	0	1	0	0	0	0	0	0	0	1	0	0	0	0	0	2	2	1	1	1	0	1	0	40.9	51	3.75	5	0	0	0	1	0.0298686	0	0	6	高度AS、MR。重症冠動脈。Day7死亡	1	20171003、入院中に死亡	700	1700	1100	500
60	5185275	20171011	91	0	147.1	47.5	21.9517	0	1	0	0	0	0	1	0	0	1	1	0	0	0	0	2	2	1	1	0	0	0	0	77.7	8.2	15	41	0	0	0	1	0.0292398	13	0	41	元より7.5。入院後に追加。高度な貧血、肝膿瘍にて死亡退院	1	20171120、肝膿瘍	150	350	600	700
61	3637586	20171110	87	1	161	53.2	20.5239	0	1	1	1	1	0	1	1	1	0	1	1	1	1	0	2	1	1	1	1	1	0	0	38.3	40.8	7.5	15	0	0	0	1	0.0261069	17	0	30	尿器使用理解不良にて尿測困難	0
62	5315456	20171110	86	1	156	57.4	23.5865	0	0	0	0	0	0	0	0	0	0	0	0	0	0	0	3	1	1	1	0	1	0	0	67	52.9	7.5	15	0	0	0	1	0.0241967	9	0	22		0		3500	3800	3100	3400
63	2602810	20171114	72	1	172.5	59.9	20.1302	1	0	1	0	1	1	0	0	0	0	0	0	0	1	0	2	1	1	1	1	0	0	0	45.9	39.3	7.5	4	0	0	0	1	0.0231868	2	0	12	尿測はday2で終了	1	20180904、MRSA肺炎	1900	600
64	5597570	20171116	46	1	168	68	24.093	0	0	0	0	0	0	0	0	0	0	0	0	0	0	1	3	2	1	1	0	0	0	0	56.7		7.5	7	0	0	0	0		0	0	26		0		1500	1700	1600	1600
65	12024	20171118	82	0	152	47.2	20.4294	0	1	1	1	1	0	1	0	1	1	1	0	0	1	1	2	2	1	1	1	1	0	0	35.8	33.9	7.5	2	1	0	0	1	0.0294256	4	0	105		0		3020	2800	800	1100
66	3033345	20171126	80	1	160	53.7	20.9766	1	1	0	0	0	0	0	0	0	0	0	0	0	0	0	4	1	1	1	0	0	0	0	70	80.2	7.5	7	0	0	0	1	0.0258639	5	0	62	COPD・肺性心	0		2720	1960	1380	700
67	5139860	20171128	76	0	155	71.3	29.6774	1	1	0	1	1	0	0	0	1	1	1	0	0	1	0	2	2	1	1	0	1	1	0	64.3	55.1	7.5	7	0	0	0	1	0.0194795	6	0	27	severeMR・AF	0		2000	3200	1700	1900
68	2781626	20171130	87	1	165	50	18.3655	0	1	0	0	0	0	0	1	0	1	0	0	0	0	0	3	2	1	1	0	1	0	0	70.4	49.8	7.5	4	0	0	0	1	0.0138889	10	0	23	cavb	0		1200	3255	2565	2065
69	5039255	20171213	55	1	170	69.5	24.0484	1	0	0	0	0	0	0	0	0	0	0	0	0	0	0	2	2	1	1	1	0	0	0	28.5	79.9	7.5	13	0	0	0	0		0	0	18		0		1000	4400	6400	5700
70	5606141	20171213	43	1	161	73.9	28.5097	0	1	1	0	0	0	1	0	1	1	0	0	0	0	1	2	2	1	1	0	0	0	0	13.5	64.1	7.5	7	1	0	1	0		0	0	28		0		5200	9700	2550	3900
71	546430	20171213	95	0	148	43.3	19.7681	0	0	0	1	0	0	1	1	0	0	1	1	0	0	1	2	2	1	1	0	1	1	0	63.3	58.8	7.5	3	1	0	0	0		0	0	3	3日で帰宅希望にて退院、AF、massiveTR	0		450	700	850
72	262511	20171218	82	1	162.9	61.9	23.3264	0	1	0	0	0	0	0	1	0	1	1	1	0	0	0	2	2	1	1	0	0	0	1	37.9	47.5	7.5	4	0	0	0	1	0.0224376	4	0	10		0		1800	900	1200	1500
73	5487243	20171218	59	1	173.8	68.5	22.6773	0	0	1	0	1	0	1	0	0	0	0	0	0	0	0	2	2	1	1	1	0	1	0	25.9	67.1	7.5	10	0	0	0	1	0.0202758	4	0	10	OMI、内服中断	0		400	2900	2150	1700
74	3805788	20171222	83	1	167.5	72	25.6627	0	1	0	1	0	0	1	0	1	1	0	0	0	0	0	2	1	1	1	0	1	1	0	38.5	37.5	7.5	7	1	0	0	0		0	0	8	AF、AS→後日TAVR	0		2400	2750	2800	2600
75	5150953	20171222	81	0	152.7	41.5	17.798	0	0	1	1	0	0	0	0	0	0	0	0	0	1	0	2	2	1	1	0	1	0	0	50.1	58	7.5	13	0	0	0	1	0.0334672	6	0	19	af tachy	0		2400	2500	2200	1400
76	1482853	20171225	72	1	170	63.5	21.9723	1	0	1	1	0	0	0	0	0	0	0	0	0	1	0	2	2	1	1	0	1	0	1	38.4	63.8	7.5	13	0	0	0	0		0	1	13	抗がん剤心筋症、PAF	0		2500	2000	2450	3450
77	381492	20180105	86	0	135.5	41.4	22.5487	1	1	0	0	0	0	1	1	1	0	0	0	0	0	0	2	2	1	1	1	0	0	0	39.5	37.8	7.5	11	1	0	0	1	0.033548	10	0	39	認知症強く原因精査は困難	0		1900	1800	2200	2950
78	5616489	20180105	69	0	152.2	51.9	22.4046	0	0	0	1	0	0	1	0	0	0	1	1	0	0	0	2	2	1	1	0	1	1	0	34.5	63.8	7.5	11	1	0	0	1	0.0267609	6	0	13	m弁膜症術後、AF	0		1700	3900	2000	3000
79	5199536	20180110	90	0	150.5	56.9	25.1211	0	1	1	1	0	0	0	1	0	1	0	0	0	0	0	3	1	1	1	0	1	0	0	58.5	59.1	7.5	7	0	0	0	1	0.0244093	2	0	19	AF、SSS→入院中にPMI	0		1800	1300	2200
80	5583530	20180209	84	0	137	37.6	20.033	0	1	1	0	0	0	1	0	1	0	0	0	0	1	0	2	2	1	1	0	0	1	0	16.8	35.5	7.5	18	0	0	0	1	0.0369385	3	1	18	せん妄強く原因精査困難	0		800	1200	1540	440
81	1667306	20180214	77	1	165.8	68	24.7366	1	1	0	1	1	0	0	1	0	1	0	0	0	0	0	3	2	1	1	1	1	0	0	68.6	47	7.5	4	0	0	0	1	0.0204248	2	0	15		0		1900	5800	6800	5600
82	5632666	20180215	66	0	164.8	58	21.3557	0	0	0	1	0	0	0	0	0	0	1	1	0	0	0	3	2	1	1	0	1	0	0	39.9	64.4	7.5	7	0	0	0	0		0	0	16	初発心不全、AF	0		1400	1900	3600	2800
83	5354145	20180223	76	1	164	65.7	24.4274	1	1	1	1	1	0	1	1	1	0	0	0	0	1	1	3	1	1	1	1	0	1	0	35.3	47.1	7.5	1	0	0	0	1	0.0211399	5	0	21	TVD PCI後、AVR後、PAF-CryoABL後	0		1000	600	2500	2600
84	1208320	20180226	76	0	164	48.2	17.9209	0	1	0	0	0	0	0	0	1	0	0	0	0	0	0	3	2	1	1	0	0	0	1	33.2	65.2	7.5	7	0	0	0	1	0.0288151	3	0	16	dcm疑い	0		1700	3900	2100	1900
85	2837041	20180302	83	1	166	59.1	21.4472	0	0	0	0	0	0	1	0	0	0	0	0	0	0	0	2	2	1	1	0	0	0	0	45.8	30.3	7.5	4	0	0	0	1	0.0235007	1	0	11	入院中誤嚥性肺炎にて死亡	1	20180312、誤嚥性肺炎	200	200	1400	2400
86	5139860	20180309	77	0	155	68.5	28.512	1	1	0	1	1	0	0	1	1	1	1	1	0	1	0	2	2	1	1	0	1	1	0	63.6	55.1	7.5	11	0	0	0	1	0.0202758	7	0	18	severeMR・AF	0		1700	2300	2000	2500
87	1652321	20180323	52	1	170.1	61.5	21.2553	0	1	0	0	0	0	0	0	0	0	0	0	0	0	0	3	1	1	1	0	0	1	0	34.8	50.2	7.5	7	0	0	0	1	0.0225836	5	0	21	severeAR	0		2100	2600	2000	2300
88	5600370	20180514	73	0	152.9	52.8	22.5849	1	1	1	0	0	0	1	1	1	0	1	0	0	1	0	2	2	1	1	0	0	0	0	31.4	18.4	3.75	18	0	0	0	1	0.0263047	6	1	18	CRF	0		2500	3700	2200	2800
89	5666335	20180525	61	1	167	60.1	21.5497	1	1	0	0	0	0	0	1	0	1	1	0	0	0	0	2	1	1	1	1	0	0	0	22.7	81.7	7.5	19	0	0	0	1	0.0231096	5	1	19		0		2200	3700	1400	2800
90	3120508	20180605	83	1	162	50	19.052	1	1	0	0	0	0	1	1	1	0	1	1	0	1	1	2	2	1	1	0	0	0	0	23.9	41.3	7.5	4	1	0	0	1	0.0277778	7	0	16		0		700	2100	2300	3400
91	3947199	20180605	87	0	152	50.5	21.8577	1	1	0	1	0	0	1	1	0	1	0	0	0	0	1	3	2	1	1	0	1	0	0	57.5	63.7	7.5	7	0	0	0	1	0.0275028	7	1	38	TLVいったん中止となるもその後再開	0		3100	3000	3400	3700
92	5714060	20180925	70	1	159	70.2	27.7679	1	1	0	1	0	0	0	0	0	0	0	0	0	0	0	3	2	1	1	0	1	1	0	42	70	7.5	7	0	0	0	1	0.0197847	2	0	21	massiveTR	0		2100	7600	2600	800
93	5723942	20181022	73	0	156.3	64.4	26.3614	1	1	1	1	0	0	1	0	0	1	1	0	1	1	1	3	2	1	1	1	1	1	0	24	45.8	7.5	40	0	0	0	1	0.0215666	4	1	40		0		700	2500	2200	1100
94	810242	20181107	91	1	166	50.1	18.1812	0	0	0	0	0	0	0	0	0	0	1	0	0	0	0	2	2	1	1	0	0	0	0	39.2	28.1	7.5	9	0	0	0	1	0.0138612	3	0	27		0		400	2300	2000	1000
95	5600370	20181210	73	0	152.9	52.3	22.3711	1	1	1	0	0	0	1	1	1	1	1	0	0	1	1	2	2	1	1	0	0	0	0	29.7	18.4	3.75	27	0	0	0	1	0.0265562	8	1	27	CRF、前回入院より3.75、退院前より7.5	0		1950	2100	1700	2050
96	5229139	20181225	92	0	140	37	18.8776	0	0	0	0	1	0	0	0	0	1	1	0	0	0	0	2	2	1	1	1	1	1	0	25.3	15.4	7.5		1	0	0	1	0.0375375	1	1		OMI,severeMR,AF,day6より高Na	0		400	900	1200	1800
97	5746295	20181225	72	0	154.5	75.1	31.4618	1	1	1	1	0	1	1	1	1	1	1	0	0	0	0	3	1	1	1	0	1	1	0	65.4	79	7.5	7	0	0	0	1	0.0184939	10	0	19	af,severeTR	0		1800	2800	5550	4300
98	2631815	20180105	76	0	143.2	61	29.747	0	1	0	0	0	0	1	1	1	0	0	0	0	0	0	2	1	1	1	0	0	1	0	51.9	52.1	7.5	8	0	0	0	0		0	0	20	severeAS	0		1260	950	900	1000
99	5546527	20180117	69	0	149.3	57.9	25.9752	1	1	1	0	1	0	1	1	1	1	1	0	0	1	1	3	1	1	1	1	0	0	0	29.4	57.4	7.5	15	0	0	0	0		0	1	15	元より3.75、入院後に7.5に	0		2900	1900	1000	1200
100	5602494	20180202	91	0	137.5	44.1	23.3256	0	1	1	0	0	0	1	0	1	0	1	0	0	1	0	2	1	1	1	0	0	0	0	60.5	45.2	15	28	0	0	0	0		0	1	28	元より3.75、入院後に7.5→15に	0		980	2435	2050	2380
101	3637586	20180204	87	1	161	46.5	17.9391	0	1	1	1	1	0	1	0	1	0	1	1	0	1	1	3	1	1	0	1	1	0	0	37.6	43.3	7.5	17	0	0	0	0		0	0	32		0		2100	2600	3100	3400
102	5635235	20180226	84	0	136.2	43.7	23.5574	0	0	0	0	0	0	0	0	0	0	0	0	0	0	0	2	2	1	1	0	0	0	0	50.3	64.4	7.5	19	0	0	0	0		0	0	19	vit.B12欠乏性貧血	0		3600	2250	1600	1100
103	507142	20180403	82	1	162	57.2	21.7955	0	1	0	1	0	0	1	1	1	1	1	1	0	0	1	2	2	1	1	0	0	0	0	70.6	60.7	7.5	11	1	0	0	0		0	1	11		0		1800	3500	3100	2700
104	268622	20180420	77	0	153.3	48.8	20.7652	0	0	0	0	0	1	0	0	0	0	0	0	0	0	0	2	2	1	1	1	0	0	0	32.2	81.2	7.5	22	0	0	0	0		0	1	22		0		3100	2000	1200	1550
105	5139860	20180421	77	0	155	67.8	28.2206	1	1	1	1	0	0	1	1	1	1	1	0	0	1	0	2	2	1	1	0	1	0	0	59.6	43.6	7.5	4	0	0	0	0		0	0	23		0		2370	3200	2810	2100
106	5571437	20180531	96	0	150	37.9	16.8444	0	1	0	0	0	0	0	1	0	1	1	0	0	0	0	2	2	1	1	0	0	1	0	40	22.1	15	4	1	0	0	0		0	1	44	Na高知にて一旦中止となるも、その後再開、退院後まで	0		400	1700	1200	1300
107	2433833	20180608	78	1	168	60.5	21.4357	1	1	1	1	1	0	1	0	0	0	0	0	0	0	0	2	2	1	1	1	1	0	0	18.5	40.8	7.5	15	0	0	0	0		0	1	15	以前の内服薬自己中断による心不全増悪	0		2500	2400	3200	2200
108	1147994	20180618	83	0	147	47.85	22.1436	1	1	0	0	1	0	1	0	0	1	1	0	0	0	0	2	2	1	1	1	0	0	0	44.8	21.5	7.5	5	1	0	0	0		0	0	55	死亡退院	1	20180811、無気肺・肺炎	500	2800	2850	2250
109	3846280	20180625	94	0	141	37.5	18.8622	0	1	0	0	0	0	1	1	0	1	1	1	0	0	0	2	2	1	1	0	0	0	0	39.4	65.7	7.5	3	0	0	0	0		0	0	9	尿量測定なし	0
110	5678554	20180625	79	0	137	47	25.0413	0	0	0	1	0	0	1	0	1	0	1	0	1	0	0	2	2	1	1	0	1	0	0	74.9	42.3	7.5	13	0	0	0	0		0	1	13	徐脈性AF	0		800	1100	1000	1200
111	1630177	20180815	76	1	164	62.7	23.312	1	1	0	1	1	0	1	0	0	0	1	0	0	0	0	2	2	1	1	1	1	0	0	46.8	19.4	7.5	20	0	0	0	0		0	1	20		0		2200	2700	2200	2600
112	1630177	20180914	76	1	164	64.1	23.8325	1	1	0	1	1	0	1	0	0	0	1	0	0	0	0	2	2	1	1	1	1	0	0	36.9	19.4	7.5	34	0	0	0	1	0.0216675	16	1	34	前回退院時より3.75、入院後に7.5に増量	0		1300	1600	1440	1230
113	4765	20180914	85	1	138.3	41.9	21.9063	1	1	1	1	0	0	1	0	1	1	1	1	0	1	1	2	2	1	1	0	1	0	0	60.3	39	3.75	14	0	0	0	0		0	1	14		0		1300	1200	1100	900
114	5713891	20180924	92	1				0	1	0	0	0	0	0	0	0	0	0	0	0	0	0	2	2	1	1	0	0	0	0	49.3	57.4	7.5	12	0	0	0	0		0	0	16	認知症、医療拒否にて継続診療困難	0		4850	5300	4700	2300
115	5721169	20181015	77	1	157.7	51.5	20.7083	1	1	0	0	1	0	0	1	0	1	0	0	1	0	0	2	2	1	1	1	0	0	0	47.3	57.7	7.5	23	0	0	0	0		0	1	23	尿量測定なし	0
116	5732077	20181115	40	1	168.5	85.8	30.2195	0	0	0	1	0	0	0	0	1	0	0	0	0	0	0	2	2	1	1	0	1	0	0	20.1	71.2	7.5	5	0	0	0	0		0	0	17		0		3000	4000	2400	3100
117	3846280	20181213	94	0	141	44.9	22.5844	0	1	0	0	0	0	1	1	0	1	1	0	0	0	0	2	2	1	1	0	0	0	0	39.4	65.7	7.5	3	0	0	0	0		0	1	16		1	20181229、退院後約1M、不詳	1020	3500	2500	3900
[truncated: 133 more columns]
